# Supplementary material for: A comparison of two gluteus maximus EMG maximum voluntary isometric contraction positions
Source: PeerJ. 2015 Sep 22;3:e1261. doi: 10.7717/peerj.1261 (PMC4582950; doi:10.7717/peerj.1261)
Supplement: Supplemental Information 1 [file peerj-03-1261-s001.xlsx]

## Sheet: Sheet1
	Upper PRONE	Upper SQUEEZE	Lower PRONE	Lower SQUEEZE
1	100	72	100	76.5
2	100	99	100	70.6
3	98	100	100	82.7
4	100	70.3	100	79.2
5	67.4	100	55.3	100
6	88.4	100	98	100
7	100	78	100	63.1
8	72.3	100	75.4	100
9	88.1	100	100	84
10	100	96.6	100	70.4
11	81	100	100	97
12	100	92	100	91
13	100	88.6	100	92
